# Supplementary material for: Coordinated Fc-effector and neutralization functions in HIV-infected children define a window of opportunity for HIV vaccination
Source: PubMed Central journal article supplement (PMC8462450; doi:10.1097/qad.0000000000002976), 2021-06-10

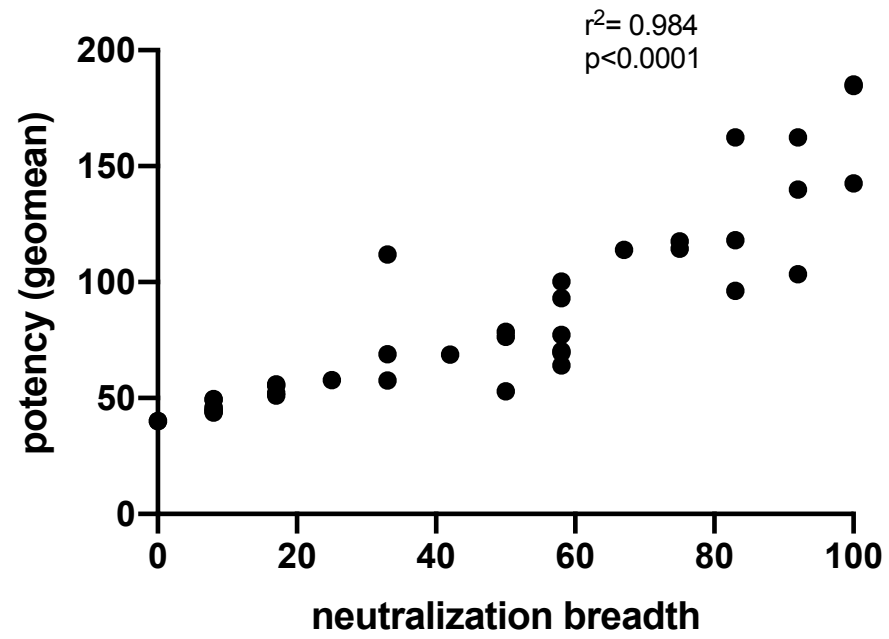

Supplement: aids-35-1895-s003.pdf [file aids-35-1895-s003.pdf]
