# Supplementary material for: Coordinated Fc-effector and neutralization functions in HIV-infected children define a window of opportunity for HIV vaccination
Source: PubMed Central journal article supplement (PMC8462450; doi:10.1097/qad.0000000000002976), 2021-06-10
Supplement: aids-35-1895-s005.pdf [file aids-35-1895-s005.pdf]

## Spearman's rho

|                 | AGE       | IgG       | IgG1      | IgG2      | IgG3      | IgG4      | IgA       | IgA1      | IgA2      | ADCP      | ADNP      | ADCD      | IFNg      | MIP-1b    | CD107a    | CD4 PER   | CD4 COUNT    | VIRAL LOAD   | NEUT BREADTH | FC POLYFUNCTION |
|-----------------|-----------|-----------|-----------|-----------|-----------|-----------|-----------|-----------|-----------|-----------|-----------|-----------|-----------|-----------|-----------|-----------|--------------|--------------|--------------|-----------------|
| AGE             | 1         | 0.04779   | 0.276304  | 0.324925  | 0.147867  | 0.44639   | 0.467108  | 0.513397  | 0.321962  | 0.157551  | 0.410187  | 0.25224   | 0.304526  | 0.412689  | 0.413293  | -0.091915 | -0.400226604 | 0.089725964  | 0.376611071  | 0.316684249     |
| IgG             | 0.04779   | 1         | 0.1818347 | 0.442914  | 0.512175  | 0.405022  | 0.346525  | 0.28449   | 0.531813  | 0.398569  | 0.531089  | 0.520474  | 0.434256  | 0.471428  | 0.417461  | -0.33917  | -0.255230776 | 0.097992879  | 0.395371219  | 0.576911089     |
| IgG1            | 0.276304  | 0.1818347 | 1         | 0.573781  | 0.520553  | 0.477866  | 0.488354  | 0.42859   | 0.672332  | 0.441502  | 0.712516  | 0.671805  | 0.463989  | 0.597604  | 0.53277   | -0.37375  | -0.358161351 | 0.052582183  | 0.545631028  | 0.661660079     |
| IgG2            | 0.324925  | 0.442914  | 0.573781  | 1         | 0.3       | 0.288933  | 0.460001  | 0.522793  | 0.479051  | 0.493017  | 0.458893  | 0.523452  | 0.354898  | 0.44919   | 0.431994  | -0.4917   | -0.476172608 | 0.286009516  | 0.81144182   | 0.527009223     |
| IgG3            | 0.147867  | 0.512175  | 0.520553  | 0.3       | 1         | 0.632279  | 0.351872  | 0.334519  | 0.357971  | 0.220422  | 0.348617  | 0.378524  | 0.217054  | 0.257928  | 0.236082  | -0.306478 | -0.298311445 | 0.312112814  | 0.223413786  | 0.316996047     |
| IgG4            | 0.44639   | 0.405022  | 0.477866  | 0.288933  | 0.632279  | 1         | 0.445423  | 0.500264  | 0.510145  | 0.17365   | 0.347299  | 0.422003  | 0.301621  | 0.396195  | 0.313319  | -0.051822 | -0.290056285 | 0.280563504  | 0.489224577  | 0.30342556      |
| IgA             | 0.467108  | 0.346525  | 0.488354  | 0.460001  | 0.351872  | 0.445423  | 1         | 0.772084  | 0.522525  | 0.509674  | 0.549045  | 0.462448  | 0.472233  | 0.6063    | 0.57861   | -0.271691 | -0.394558316 | 0.172459498  | 0.462073216  | 0.631298852     |
| IgA1            | 0.513397  | 0.28449   | 0.42859   | 0.522793  | 0.334519  | 0.500264  | 0.772084  | 1         | 0.711462  | 0.461792  | 0.486166  | 0.468116  | 0.533051  | 0.634531  | 0.537844  | -0.336032 | -0.419699812 | 0.301971964  | 0.57217524   | 0.576679842     |
| IgA2            | 0.321962  | 0.531813  | 0.672332  | 0.479051  | 0.357971  | 0.510145  | 0.522525  | 0.711462  | 1         | 0.390119  | 0.445718  | 0.547431  | 0.453982  | 0.575758  | 0.486258  | -0.315587 | -0.327204503 | 0.153615091  | 0.614019241  | 0.523188406     |
| ADCP            | 0.157551  | 0.398569  | 0.441502  | 0.493017  | 0.220422  | 0.17365   | 0.509674  | 0.461792  | 0.390119  | 1         | 0.581561  | 0.666267  | 0.528265  | 0.633304  | 0.589123  | -0.232315 | -0.152219873 | 0.167983117  | 0.403633404  | 0.814453782     |
| ADNP            | 0.410187  | 0.531089  | 0.712516  | 0.458893  | 0.348617  | 0.347299  | 0.549045  | 0.486166  | 0.445718  | 0.581561  | 1         | 0.610084  | 0.630408  | 0.745115  | 0.664568  | -0.426789 | -0.458169737 | 0.166572679  | 0.45258221   | 0.844993998     |
| ADCD            | 0.25224   | 0.520474  | 0.671805  | 0.523452  | 0.378524  | 0.422003  | 0.462448  | 0.468116  | 0.547431  | 0.666267  | 0.610084  | 1         | 0.711327  | 0.822188  | 0.790382  | -0.304108 | -0.288734521 | 0.094499318  | 0.442352168  | 0.779207683     |
| IFNg            | 0.304526  | 0.434256  | 0.463989  | 0.354898  | 0.217054  | 0.301621  | 0.472233  | 0.533051  | 0.453982  | 0.528265  | 0.630408  | 0.711327  | 1         | 0.909032  | 0.92119   | -0.258014 | -0.268454744 | 0.074051706  | 0.554361529  | 0.814795918     |
| MIP-1b          | 0.412689  | 0.471428  | 0.597604  | 0.44919   | 0.257928  | 0.396195  | 0.6063    | 0.634531  | 0.575758  | 0.633304  | 0.745115  | 0.822188  | 0.909032  | 1         | 0.907729  | -0.328518 | -0.412020906 | 0.117184371  | 0.576178685  | 0.90588363      |
| CD107a          | 0.413293  | 0.417461  | 0.53277   | 0.431994  | 0.236082  | 0.313319  | 0.57861   | 0.537844  | 0.486258  | 0.589123  | 0.664568  | 0.790382  | 0.92119   | 0.907729  | 1         | -0.234334 | -0.278397213 | 0.021977138  | 0.572644789  | 0.860508033     |
| CD4 PER         | -0.091915 | -0.33917  | -0.37753  | -0.4917   | -0.306478 | -0.051822 | -0.271691 | -0.336032 | -0.315587 | -0.232315 | -0.426789 | -0.304108 | -0.258014 | -0.328518 | -0.234334 | 1         | 0.767117738  | -0.471839761 | -0.345405445 | -0.388380196    |
| CD4 COUNT       | -0.400227 | -0.255231 | -0.358161 | -0.476173 | -0.298311 | -0.290056 | -0.394558 | -0.4197   | -0.327205 | -0.15222  | -0.45817  | -0.288735 | -0.268455 | -0.412021 | -0.278397 | 0.767118  | 1            | -0.471575859 | -0.466328254 | -0.382059801    |
| VIRAL LOAD      | 0.089726  | 0.097993  | 0.052582  | 0.28601   | 0.312113  | 0.280564  | 0.172459  | 0.301972  | 0.153615  | 0.167983  | 0.166573  | 0.094499  | 0.074052  | 0.117184  | 0.021977  | -0.47184  | -0.471575859 | 1            | 0.150877128  | 0.137094533     |
| NEUT BREADTH    | 0.376611  | 0.395371  | 0.545631  | 0.811442  | 0.223414  | 0.489225  | 0.462073  | 0.572175  | 0.614019  | 0.403633  | 0.452582  | 0.442352  | 0.554362  | 0.576179  | 0.572645  | -0.345405 | -0.466328254 | 0.150877128  | 1            | 0.597356719     |
| FC POLYFUNCTION | 0.316684  | 0.576911  | 0.66166   | 0.527009  | 0.316996  | 0.303426  | 0.631299  | 0.57668   | 0.523188  | 0.814454  | 0.844994  | 0.779208  | 0.814796  | 0.905884  | 0.860508  | -0.38838  | -0.382059801 | 0.137094533  | 0.597356719  | 1               |

## p values

|                 | AGE      | IgG      | IgG1     | IgG2     | IgG3     | IgG4     | IgA      | IgA1     | IgA2     | ADCP     | ADNP     | ADCD     | IFNg     | MIP-1b   | CD107a      | CD4 PER     | CD4 COUNT   | VIRAL LOAD  | NEUT BREADTH | FC POLYFUNCTION |
|-----------------|----------|----------|----------|----------|----------|----------|----------|----------|----------|----------|----------|----------|----------|----------|-------------|-------------|-------------|-------------|--------------|-----------------|
| AGE             |          | 0.755236 | 0.08034  | 0.03819  | 0.356206 | 0.003439 | 0.001217 | 0.000597 | 0.040089 | 0.301314 | 0.005134 | 0.0946   | 0.044446 | 0.005956 | 0.005876    | 0.562637986 | 0.007830377 | 0.56244686  | 0.025749527  | 0.034048973     |
| IgG             | 0.755236 |          | 6.64E-12 | 0.002312 | 0.000322 | 0.005782 | 0.013692 | 0.058217 | 0.00017  | 0.004146 | 7.25E-05 | 0.000107 | 0.001823 | 0.000719 | 0.003156    | 0.027997069 | 0.098569671 | 0.526848326 | 0.017001971  | 1.15795E-05     |
| IgG1            | 0.08034  | 6.64E-12 |          | 3.78E-05 | 0.000247 | 0.000901 | 0.000666 | 0.00331  | 4.24E-07 | 0.002397 | 4.02E-08 | 4.36E-07 | 0.001512 | 1.84E-05 | 0.000197    | 0.017817064 | 0.023253258 | 0.074273527 | 0.001238247  | 7.46709E-07     |
| IgG2            | 0.03819  | 0.002312 | 3.78E-05 |          | 0.045262 | 0.001477 | 0.000229 | 0.000871 | 0.00058  | 0.001521 | 0.000224 | 0.018085 | 0.002223 | 0.003409 | 0.001477753 | 0.001897258 | 0.073597832 | 0.00199741  | 1.76099E-08  | 0.000199741     |
| IgG3            | 0.356206 | 0.000322 | 0.000247 | 0.045262 |          | 3.18E-06 | 0.017771 | 0.024703 | 0.015762 | 0.145673 | 0.018928 | 0.010349 | 0.156991 | 0.090955 | 0.122878    | 0.057744844 | 0.061527895 | 0.049917742 | 0.219017197  | 0.033863552     |
| IgG4            | 0.003439 | 0.005782 | 0.000901 | 0.054235 | 3.18E-06 |          | 0.002168 | 0.000466 | 0.000344 | 0.253958 | 0.019415 | 0.003884 | 0.04662  | 0.00776  | 0.038363    | 0.754046181 | 0.069438041 | 0.079501754 | 0.004489056  | 0.042743314     |
| IgA             | 0.001217 | 0.013692 | 0.000666 | 0.001477 | 0.017771 | 0.002168 |          | 0.000231 | 0.000157 | 0.000157 | 3.65E-05 | 0.000722 | 0.000613 | 4.94E-06 | 1.65E-05    | 0.081765866 | 0.008838884 | 0.262949556 | 0.004552279  | 8.86219E-07     |
| IgA1            | 0.000597 | 0.058217 | 0.00331  | 0.000229 | 0.024703 | 0.000466 | 5.29E-10 |          | 4.3E-08  | 0.001407 | 0.00071  | 0.001184 | 0.000195 | 3.74E-06 | 0.000166    | 0.036483742 | 0.007017948 | 0.058257841 | 0.000622531  | 3.38042E-05     |
| IgA2            | 0.040089 | 0.00017  | 4.24E-07 | 0.000871 | 0.015762 | 0.000344 | 0.000231 | 4.3E-08  |          | 0.008067 | 0.002152 | 9.95E-05 | 0.001966 | 4.33E-05 | 0.000818    | 0.050341059 | 0.039311068 | 0.343958529 | 0.000185564  | 0.00022644      |
| ADCP            | 0.301314 | 0.004146 | 0.002397 | 0.00058  | 0.145673 | 0.253958 | 0.000157 | 0.001407 | 0.008067 |          | 9.46E-06 | 1.28E-07 | 9.57E-05 | 1.36E-06 | 1.06E-05    | 0.138745748 | 0.329831524 | 0.275729077 | 0.014638437  | 6.26091E-13     |
| ADNP            | 0.005134 | 7.25E-05 | 4.02E-08 | 0.001521 | 0.018928 | 0.019415 | 3.65E-05 | 0.00071  | 0.002152 | 9.46E-06 |          | 2.56E-06 | 1.21E-06 | 1.25E-09 | 2.59E-07    | 0.004822658 | 0.002004221 | 0.27983888  | 0.00557976   | 1.20513E-14     |
| ADCD            | 0.0946   | 0.000107 | 4.36E-07 | 0.000224 | 0.010349 | 0.003884 | 0.000722 | 0.001184 | 9.95E-05 | 1.28E-07 | 2.56E-06 |          | 1.01E-08 | 7.79E-13 | 2.38E-11    | 0.050227554 | 0.060411186 | 0.541755914 | 0.006905096  | 2.64852E-11     |
| IFNg            | 0.044446 | 0.001823 | 0.001512 | 0.018085 | 0.156991 | 0.04662  | 0.000613 | 0.000195 | 0.001966 | 9.57E-05 | 1.21E-06 | 1.01E-08 |          | 4.18E-19 | 4.18E-19    | 1.76E-20    | 0.103373619 | 0.085615375 | 0.636977134  | 0.000549284     |
| MIP-1b          | 0.005956 | 0.000719 | 1.84E-05 | 0.002223 | 0.090955 | 0.00776  | 4.94E-06 | 3.74E-06 | 4.33E-05 | 1.36E-06 | 1.25E-09 | 7.79E-13 | 4.18E-19 |          | 5.71E-19    | 0.03848244  | 0.007435381 | 0.459861624 | 0.0003624    | 8.82445E-19     |
| CD107a          | 0.005876 | 0.003156 | 0.000197 | 0.003409 | 0.122878 | 0.038363 | 1.65E-05 | 0.000166 | 0.000818 | 1.06E-05 | 2.59E-07 | 2.38E-11 | 1.76E-20 | 5.71E-19 |             | 0.145554356 | 0.077982467 | 0.890124699 | 0.000401406  | 4.53404E-15     |
| CD4 PER         | 0.562638 | 0.027997 | 0.017817 | 0.001478 | 0.057745 | 0.754046 | 0.081766 | 0.036484 | 0.050341 | 0.138746 | 0.004823 | 0.050228 | 0.103374 | 0.038482 | 0.145554    |             | 3.12181E-09 | 0.001843293 | 0.048980281  | 0.011032068     |
| CD4 COUNT       | 0.00783  | 0.09857  | 0.023253 | 0.001897 | 0.061528 | 0.069438 | 0.008839 | 0.007018 | 0.039311 | 0.329832 | 0.002004 | 0.060411 | 0.085615 | 0.007435 | 0.077982    | 3.12181E-09 |             | 0.001618526 | 0.005438061  | 0.011463828     |
| VIRAL LOAD      | 0.562447 | 0.526848 | 0.747274 | 0.073598 | 0.049918 | 0.079502 | 0.26295  | 0.058258 | 0.343959 | 0.275729 | 0.279839 | 0.541756 | 0.636977 | 0.459862 | 0.890125    | 0.001843293 | 0.001618526 |             | 0.386955267  | 0.374861993     |
| NEUT BREADTH    | 0.02575  | 0.017002 | 0.001238 | 1.76E-08 | 0.219017 | 0.004489 | 0.004552 | 0.000623 | 0.000186 | 0.014638 | 0.00558  | 0.000549 | 0.000362 | 0.000401 | 0.048980281 | 0.005438061 |             | 0.386955267 | 0.000119846  | 0.000119846     |
| FC POLYFUNCTION | 0.034049 | 1.16E-05 | 7.47E-07 | 0.0002   | 0.033864 | 0.042743 | 8.86E-07 | 3.38E-05 | 0.000226 | 6.26E-13 | 1.21E-14 | 2.65E-11 | 1.05E-12 | 8.82E-19 | 4.53E-15    | 0.011032068 | 0.011463828 | 0.374861993 | 0.000119846  | 1               |
